# Supplementary material
Source: publisher figshare collection journal article supplement (https://acs.figshare.com/ndownloader/files/7817710)
Supplement: Supplementary file 1 [file 7817710]

## Supporting Information

### **The role of free radicals/reactive oxygen species in MeHg photodegradation-importance of utilizing appropriate scavengers**

Xiaoxiao Han<sup>‡</sup>, Yanbin Li<sup>†,‡,\*</sup>, Dan Li<sup>‡</sup>, and Chang Liu<sup>‡</sup>

<sup>†</sup>Key Laboratory of Marine Chemistry Theory and Technology, Ministry of Education, Ocean University of China, Qingdao 266100, China

<sup>‡</sup>College of Chemistry and Chemical Engineering, Ocean University of China, Qingdao 266100, China

\*Corresponding Author:

Yanbin Li

Tel: +86-0532-66786355

Fax: +86-0532-66782301

Email address: liyanbin@ouc.edu.cn

This supporting information contains 16 pages, including 3 Figures and 6 Tables.

### **Determination of MeHg in water samples**

MeHg in water samples was analyzed using distillation-aqueous ethylation derivatization-purge and trap followed by GC/CV-AFS detection. Acidified water samples were distilled according to the EPA method 1630. 45 mL distilled water was then poured into a 150 mL bubbler and the volume was brought to 100 mL with DI water. 2 mL of acetate buffer (2 M) and 50  $\mu\text{L}$  of 1%  $\text{NaBEt}_4$  were added and allowed to react for 15 min. Ethylation products were purged from the bubbler with  $\text{N}_2$  at  $200\text{ mL min}^{-1}$  for 15 min, and then trapped on a Tenax trap. The trap was dried for 5 min under  $200\text{ mL min}^{-1}$  of  $\text{N}_2$ . Finally, the trapped Hg species were thermally desorbed and separated using an OV-3 packed column at  $70\text{ }^\circ\text{C}$  and then measured with a Model III AFS (Brooks Rand, USA).

Standard quality assurance and control procedures were followed during the analysis of MeHg. For each 20 samples, two method blanks and two spikes were included. The recoveries of all spikes (85–110%) were within the acceptable recoveries of the EPA method 1630 (65–135% for MeHg).

### **Determination of ancillary parameters in water samples**

The concentration of dissolved organic carbon (DOC) was determined by a TOC analyzer (Analyticjena, Germany). Nitrate ( $\text{NO}_3^-$ ) was determined by an Auto Analyzer 3 (SEAL Analytical, Germany). Total dissolved iron (Fe) in seawater and freshwater was measured by an adsorptive cathodic stripping votammetry (HMDE, Metro hmmodel 797 VA, Switzerland) and an ICP-AES (Thermo Fisher Inc., USA), respectively.<sup>1</sup> pH was measured by a pH meter (Sartorius Inc., Germany). Salinity was measured by a salinity meter (YK Lutron, China). Chloride ( $\text{Cl}^-$ ) was measured by an ICS-2100 ion chromatography (Thermo Fisher, USA).

### **Determination and analysis of Excitation-emission matrix spectroscopy (EEMs) and UV-visible radiation absorbance spectra in natural water**

EEMs were obtained using a Fluorolog 3 scanning fluorometer equipped with a 450W Xe arc lamp (Ushio Inc., Japan). The excitation wavelength was 240–480 nm (5 nm intervals), and the emission wavelength (Em) was 250–580 nm (5 nm intervals).<sup>2</sup> The integration time was set to be 0.05s.<sup>3</sup> These spectra were normalized to quinine sulfate units using  $0.01\text{ mg L}^{-1}$  quinine sulfate monohydrate prepared in  $0.05\text{ mol L}^{-1}\text{ H}_2\text{SO}_4$ .<sup>3-5</sup> The Rayleigh and Raman scattering was corrected for by subtracting normalized DI water. PARAFAC modeling was

performed for all measured EEMs of water samples from Laoshan Reservoir, Ink River and Stone Old Beach. 3 components were modeled for these data, including two humic-like peaks (C1 (Ex/Em 330/415 nm) and C2 (Ex/Em 370/460 nm)) and one protein-like peak (C3 (Ex/Em 295/340 nm)).<sup>6</sup> C1 is thought to be terrestrial humus and it commonly exists in river and coastal water. C2 is related to the DOM with high molecular weight and strong aromaticity, while C3 is related to DOM influenced by human activity and sewage disposal.<sup>6,7</sup> The total fluorescence intensity (TFI) was calculated by the sum of the 3 components.<sup>7</sup>

Humification index (HIX) and biotic index (BIX) are two indices that can represent the properties and source of DOM. HIX was calculated by dividing the area under the emission spectra at 435–480 nm by that at 300–345 nm at an excitation wavelength of 255 nm. Higher HIX values indicate the higher humification degree of CDOM, meaning that the DOM is more stable and mature.<sup>3</sup> BIX was calculated as the ratio of emission fluorescence intensities at 380 nm to that at 430 nm with an excitation wavelength of 310 nm. Higher BIX represents that more CDOM is from biological source, e.g., microbial originated compounds.<sup>7</sup>

The UV-visible radiation absorbance spectrum of water samples from Laoshan Reservoir, Ink river and Stone Old Beach at the wavelength of sunlight (280-700 nm) were measured using a UV-2550 ultraviolet (UV)-visible spectrophotometer (SHIMADZU, Japan).  $SUVA_{254}$  was calculated by dividing the radiation absorbance at 254 nm by DOC concentrations.<sup>5, 8</sup>

### Calculation of the pH of scavengers in DI water

For weak monoacid solution, the concentration of  $H^+$  in scavenger HA solution can be described as Eq. (1).<sup>9, 10</sup> Since  $K_a C \geq 20K_w$ , Eq.(1) can be simplified to Eq.(2).<sup>10</sup>

$$[H^+]^3 + K_a[H^+]^2 + (K_a C + K_w)[H^+] - K_a K_w = 0 \quad (1)$$

$$[H^+]^2 + K_a[H^+] - K_a C = 0 \quad (2)$$

where  $K_a$  is the dissociation constant of scavenger HA;  $K_w$  is the dissociation constant of water ( $1 \times 10^{-14}$  in this study);  $C$  is the added concentration of HA. By resolving Eq. (2), pH of scavenger HA solution can be calculated by Eq. (3).

$$pH = -\lg [H^+] = -\lg \frac{-K_a + \sqrt{K_a^2 + 4K_a C}}{2} \quad (3)$$

Then, the change in the pH of DI water after the addition of various concentrations of

monoacidic scavengers can be calculated by Eq. (4).

$$|\Delta pH| = |pH(\text{scavenger}) - pH(\text{DI water})| = -\lg \sqrt{K_w} + \lg \frac{-K_a + \sqrt{K_a^2 + 4K_a C}}{2} \quad (4)$$

If the scavenger is weak monobasic, the pH can be described as Eq. (5) and  $\Delta pH$  can then be calculated by Eq. (6).

$$pH = -\lg K_w - pOH = -\lg K_w + \lg [OH^-] = -\lg K_w + \lg \frac{-K_b + \sqrt{K_b^2 + 4K_b C}}{2} \quad (5)$$

$$\begin{aligned} |\Delta pH| &= |pH(\text{scavenger}) - pH(\text{DI water})| = (-\lg K_w + \lg \frac{-K_b + \sqrt{K_b^2 + 4K_b C}}{2}) + \lg \sqrt{K_w} \\ &= -\lg \sqrt{K_w} + \lg \frac{-K_b + \sqrt{K_b^2 + 4K_b C}}{2} \end{aligned} \quad (6)$$

where  $K_b$  is the dissociation constant of monobasic scavenger.

### Calculation of the speciation of MeHg in the presence of scavengers and DOM

The species of MeHg in scavenger solutions include  $\text{MeHg}^+$ ,  $\text{MeHgOH}$ ,  $\text{MeHg-DOM}$ , and  $\text{MeHg}$  complexed with scavengers ( $\text{MeHgLc}$ ). Then, the total concentration of MeHg can be described as Eq. (7)

$$[\text{MeHg}]_{\text{total}} = [\text{MeHg}^+] + [\text{MeHgOH}] + [\text{MeHgDOM}] + [\text{MeHgLc}] \quad (7)$$

Formation and dissociation of the relevant species are listed as Eq. (8) - (10).

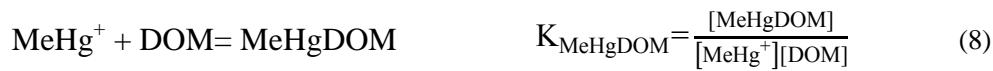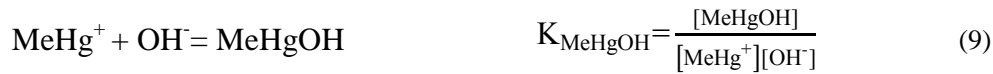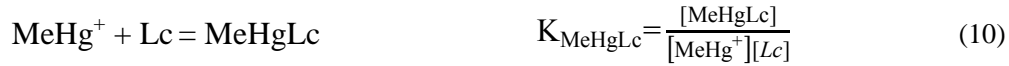

By resolving Eqs. (8) - (10), the percentage of  $\text{MeHg-DOM}$  without the addition of scavenger ( $P_{\text{control}}$ ) can be described as Eq. (11), while the percentage of  $\text{MeHg-DOM}$  in the presence of  $\text{Lc}$  scavenger ( $P_{\text{scavenger}}$ ) can be described as Eq. (12). Then, the effects of scavenger on  $\text{MeHg-DOM}$  complexation ( $P_{\text{scavenger}}/P_{\text{control}}$ ) can be calculated by Eq. (13).

$$P_{\text{control}} = \frac{K_{\text{MeHgDOM}}[\text{DOM}]}{1 + K_{\text{MeHgDOM}}[\text{DOM}] + K_{\text{MeHgOH}}[\text{OH}^-]} \quad (11)$$

$$P_{\text{scavenger}} = \frac{K_{\text{MeHgDOM}}[\text{DOM}]}{1 + K_{\text{MeHgDOM}}[\text{DOM}] + K_{\text{MeHgOH}}[\text{OH}^-] + K_{\text{MeHgLc}}[\text{Lc}]} \quad (12)$$

$$P_{\text{scavenger}}/P_{\text{control}} = \frac{1 + K_{\text{MeHgDOM}}[\text{DOM}] + K_{\text{MeHgOH}}[\text{OH}^-]^*}{1 + K_{\text{MeHgDOM}}[\text{DOM}] + K_{\text{MeHgOH}}[\text{OH}^-] + K_{\text{MeHgLc}}[\text{Lc}]} \quad (13)$$

where  $[\text{OH}^-]^*$  is the concentration of  $\text{OH}^-$  in DOM solutions without scavengers.

As  $K_{\text{MeHgDOM}}[\text{DOM}] \gg K_{\text{MeHgOH}}[\text{OH}^-]$  and  $K_{\text{MeHgOH}}[\text{OH}^-]^*$  at the experimental pH range of 2-10 (the following parameter values were adopted for the estimation:  $\log K_{\text{MeHgDOM}} = 11$  (related to DOM unit,  $\text{mmol C L}^{-1}$ )<sup>11</sup>,  $\log K_{\text{MeHgOH}} = 9.3$ <sup>12-14</sup>,  $[\text{DOM}] = 0.83 \text{ mmol C L}^{-1}$ ) and  $K_{\text{MeHgLc}}$ ,  $K_{\text{MeHgDOM}}$  and  $[\text{DOM}]$  are constants, Eq. (13) can then be simplified to Eq. (14).

$$P_{\text{scavenger}}/P_{\text{control}} = \frac{1}{1 + b[\text{Lc}]} = \frac{1}{1 + bC} \quad (14)$$

where  $b$  is a constant refers to the relation of MeHg complexed with DOM to scavenger concentrations;  $C$  is the concentration of a certain scavenger ( $\text{mmol L}^{-1}$ ).

### Effects of the candidate FR/ROS scavengers on the complexation of MeHg with DOM in nature waters

The possible effects of candidate scavengers on MeHg-DOM complexation in three tested natural waters were tested by ultrafiltration centrifugation with a 3 kDa centrifugal filter (Sartorius). Scavengers were added into 50 ml filtered water (0.22  $\mu\text{m}$  cellulose acetate filter) containing  $10 \text{ ng L}^{-1}$  MeHg to form a final concentration of  $1 \text{ mmol L}^{-1}$  and/or  $10 \text{ mmol L}^{-1}$ . A trial without adding any scavenger was employed as a control. After equilibrating for 24 h, 10 mL solutions were ultrafiltered using a 3 kDa centrifugal filter (Sartorius) at 6000 rpm for 25 min. MeHg concentrations in the two fractions ( $>3 \text{ kDa}$  and  $<3 \text{ kDa}$ ) were analyzed, and the percentage of MeHg complexed with  $>3 \text{ kDa}$  DOM ( $P$ ) were calculated according to Eq. (15). Triplicates were employed for each trial.  $P$  values with and without the addition of a certain scavengers were compared to evaluate if the scavenger affects the complexation of MeHg with DOM.

$$P = \frac{(C_1 - C_2) \times V_1}{C_1 \times V_1 + C_2 \times V_2} \quad (15)$$

where  $C_1$  and  $C_2$  are the concentrations of MeHg in the residual and filtrate solutions, respectively.  $V_1$  and  $V_2$  are the volumes of residual and filtrates solutions in the centrifugal tubing.

The effect of SOD on the complexation of MeHg with DOM was tested by a 10 kDa Ultra-15 centrifugal filter. SOD was added to 50 ml filtered water containing  $10 \text{ ng L}^{-1}$  MeHg to form a final concentration of 0.1 and  $10 \text{ mg L}^{-1}$ . After equilibrating for 24 h, 10 mL solution was ultrafiltrated using a 10 kDa centrifugal filter at 5000 rpm for 15 min. MeHg in the filtrate and residual solutions were determined.  $(1-P)$  values with and without the addition of SOD were calculated to test the influence of SOD on MeHg-DOM complexation in the three tested natural waters.

**Figure S1** Variation of MeHg concentrations in 10 mmol L<sup>-1</sup> scavenger solutions ( $\beta$ -carotene was 1 mmol L<sup>-1</sup> and SOD was 10 mg L<sup>-1</sup>) with time during incubating under sunlight (A) and in the dark (B) for 3 days.

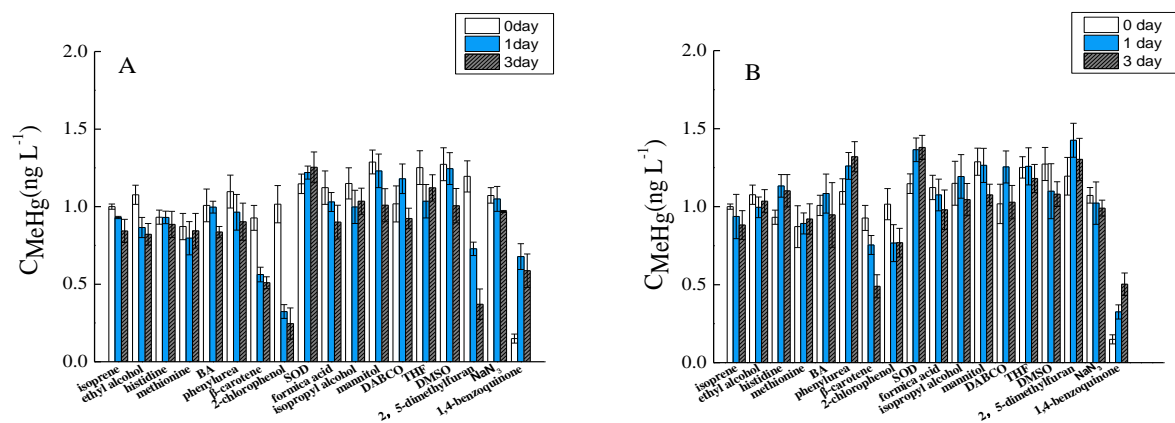

**Figure S2** Variation of MeHg concentrations in natural water with and without the addition of scavengers with time during incubating under sunlight for 3 days. A, Stone Old Beach. B, Ink River. C, Laoshan Reservoir.

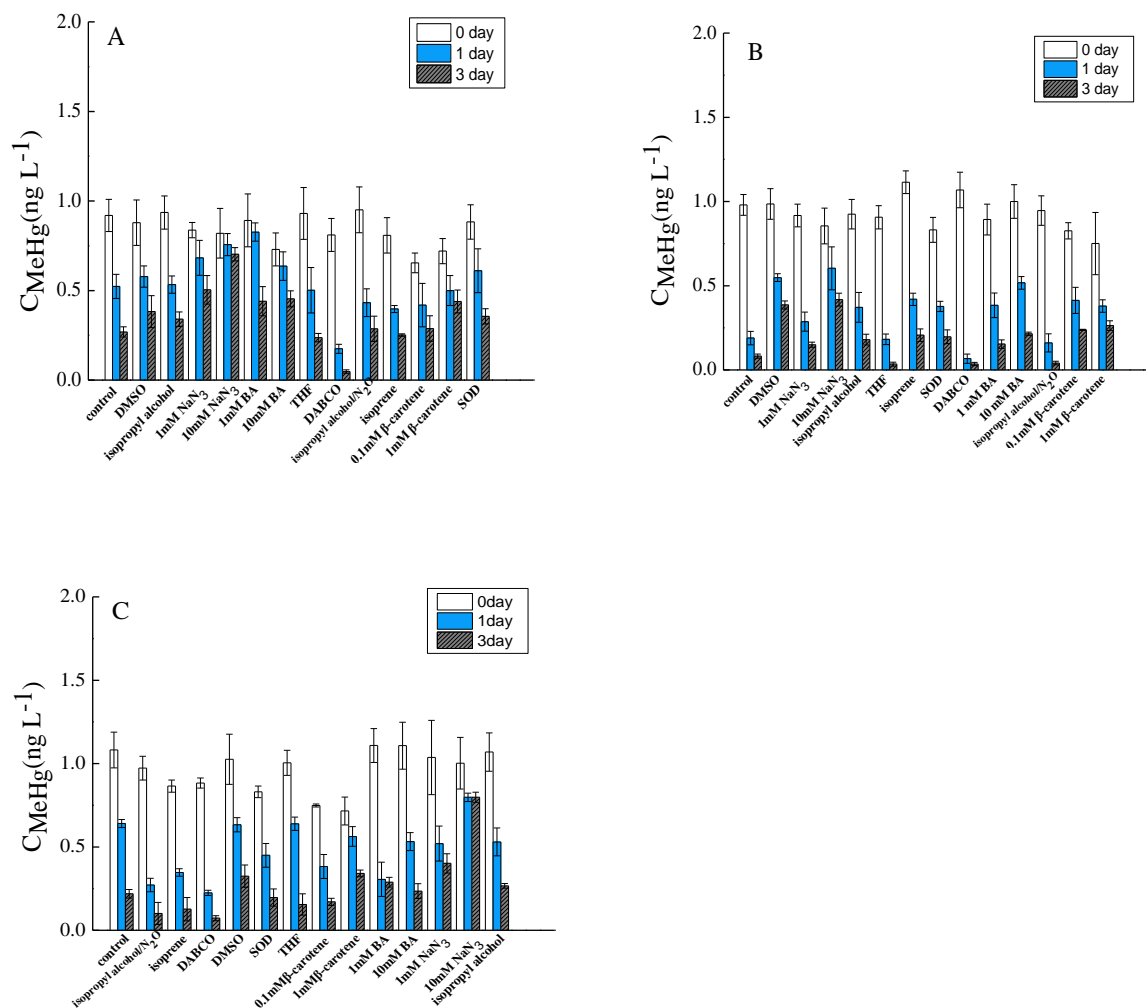



**Figure S3** The EEMs of the three components of DOM in water of Laoshan Reservoir, Ink River and Stone Old Beach. C1 and C2 are humic-like substances and C3 is the protein-like substance.

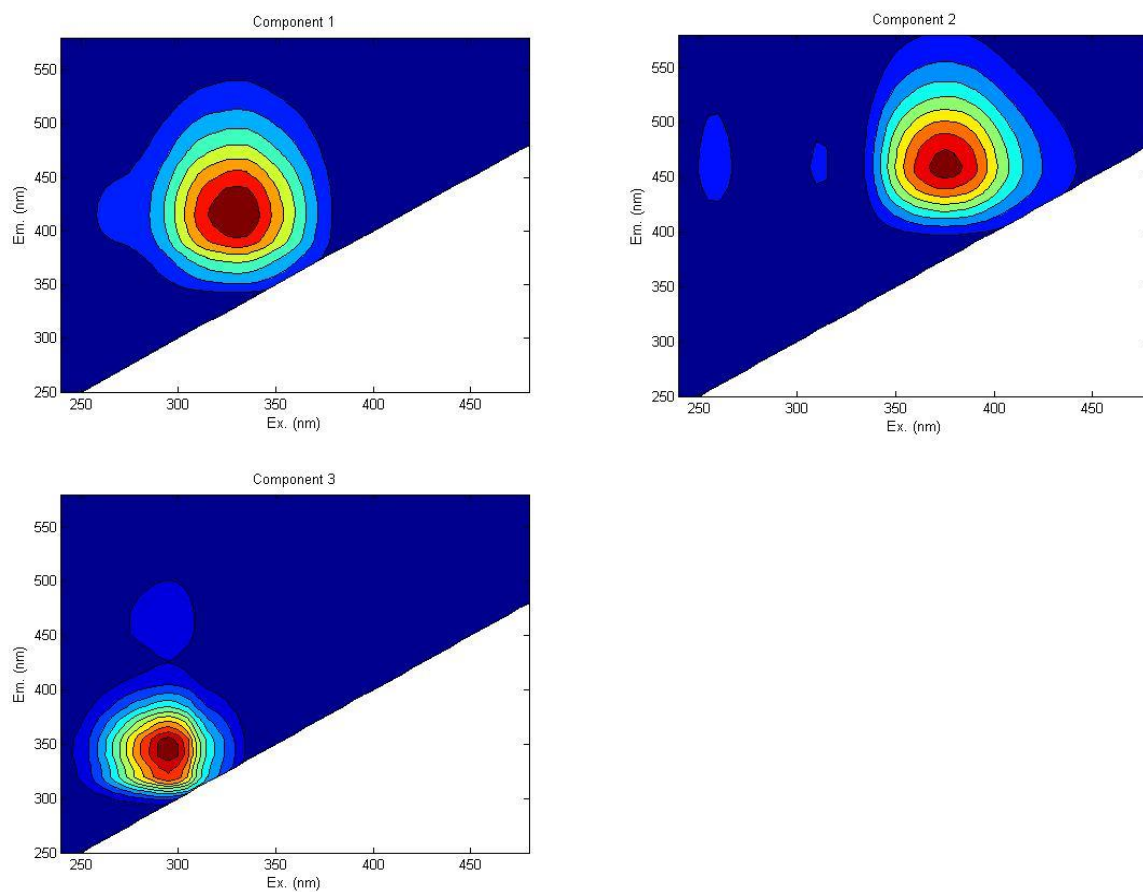

**Table S1** Chemical characteristics of three tested natural waters. HIX, humification index.

BIX, biological index. FI, fluorescence intensity. TFI, total fluorescence intensity.

BIX in Ink River was around 0.8, indicating that DOM in this system may be mainly from terrestrial discharge.<sup>3, 15</sup> A >1.0 BIX was observed in Laoshan Reservoir, suggesting the dominant contribution of biological origin to DOM.<sup>14</sup> Both terrestrial discharge and biological origin are the important sources of DOM in Stone Old Beach, indicated by its BIX value (in the range of 0.8-1.0). The percentage of C3 to TFI in Ink River was much higher than that in the other two systems, indicating that a large proportion of DOM in Ink River is from sewage discharge. In addition, the humification of DOM in Ink River was the lowest among the three tested waters, indicated by its low HIX values. Since the activity of DOM was thought to become weaker with increasing humification,<sup>3, 16</sup> DOM in Ink River may be more photoactive than the other two systems.

| Parameters                                               | Laoshan Reservoir            | Stone Old Beach | Ink River                    |
|----------------------------------------------------------|------------------------------|-----------------|------------------------------|
| pH                                                       | 8.21±0.07                    | 7.90±0.01       | 8.11±0.04                    |
| Salinity, ‰                                              | 0.05±0.05                    | 26.6±0.6        | 1.7±0.2                      |
| Cl <sup>-</sup> , mol L <sup>-1</sup>                    | (0.48±0.11)×10 <sup>-3</sup> | 0.48±0.02       | (6.74±0.31)×10 <sup>-3</sup> |
| NO <sub>3</sub> <sup>-</sup> , μmol L <sup>-1</sup>      | 87.12±8.13                   | 0.61±0.10       | 156.30±4.29                  |
| DOC, mg L <sup>-1</sup>                                  | 5.12±0.04                    | 3.35±0.27       | 6.97±0.75                    |
| Fe, nmol L <sup>-1</sup>                                 | 61.3±2.3                     | 7.1±0.5         | 132.0±6.8                    |
| HIX                                                      | 7.46                         | 2.44            | 1.98                         |
| BIX                                                      | 1.14                         | 0.97            | 0.81                         |
| FI of C1(humic-like)                                     | 2.14                         | 0.30            | 5.94                         |
| FI of C2(humic-like)                                     | 1.67                         | 0.29            | 4.93                         |
| FI of C3(protein-like)                                   | 0.31                         | 0.20            | 9.89                         |
| TFI                                                      | 4.12                         | 0.79            | 20.76                        |
| SUVA <sub>254</sub> , L mg <sup>-1</sup> m <sup>-1</sup> | 1.7                          | 0.5             | 2.8                          |

**Table S2** The scavengers used in investigating MeHg photodegradation in natural water. DMSO, dimethylsulfoxide; BA, benzoic acid; DABCO, 1, 4-diazobicyclo(2, 2, 2)octane; THF, tetrahydrofuran; SOD, superoxide dismutase.

| Scavengers                  | Concentration, mmol L <sup>-1</sup>           | Description                                |
|-----------------------------|-----------------------------------------------|--------------------------------------------|
| N <sub>2</sub> purging      | Saturated nitrogen                            |                                            |
| O <sub>2</sub> purging      | Saturated oxygen                              |                                            |
| DMSO                        | 10                                            | Scavengers of •OH                          |
| isopropyl alcohol           | 10                                            | Scavengers of •OH                          |
| BA                          | 1,10                                          | Scavengers of •OH                          |
| isoprene                    | 10                                            | Scavengers of <sup>3</sup> DOM*            |
| N <sub>2</sub> O/ isopropyl | Saturated N <sub>2</sub> O,10                 | Scavengers of e <sup>-</sup> <sub>aq</sub> |
| alcohol                     | 1,10                                          | Scavengers of <sup>1</sup> O <sub>2</sub>  |
| NaN <sub>3</sub>            | 10                                            | Scavengers of <sup>1</sup> O <sub>2</sub>  |
| DABCO                       | 0.1,1                                         | Scavengers of <sup>1</sup> O <sub>2</sub>  |
| β-carotene                  | 10                                            | Scavengers of <sup>1</sup> O <sub>2</sub>  |
| THF                         |                                               |                                            |
| SOD                         | 10 mg L <sup>-1</sup> , 0.1mg L <sup>-1</sup> | Scavengers of O <sub>2</sub> <sup>-•</sup> |

**Table S3** Values of constants related to effects of scavengers on light transmittance, pH and MeHg-DOM complexation. a, the radiation absorbance constant of a certain scavenger.  $pK_a = -\lg K_a$  and  $K_a$  is the acid dissociation constant of scavenger in DI water. b, a constant refers to the relation of the percentage of MeHg complexed with DOM with scavenger concentrations. DABCO, 1, 4-diazobicyclo (2, 2, 2) octane. BA, benzoic acid.

| Scavengers        | $pK_a^*$           | a<br>(UVB) | $r^2$ | a<br>(UVA) | $r^2$ | a<br>(PAR) | $r^2$ | b      | $r^2$ |
|-------------------|--------------------|------------|-------|------------|-------|------------|-------|--------|-------|
| formic acid       | 3.74               |            |       |            |       |            |       |        |       |
| DABCO             | 8.82               |            |       |            |       |            |       |        |       |
| histidine         | 6.0,1.82,9.17      |            |       |            |       |            |       | 0.0077 | 0.97  |
| methionine        | 2.28,9.21          |            |       |            |       |            |       | 0.031  | 0.91  |
| $NaN_3$           | 5.09 <sup>c</sup>  |            |       |            |       |            |       | 0.012  | 0.95  |
| 2,5-dimethylfuran |                    | 0.0048     | 0.98  |            |       |            |       | 0.0038 | 0.65  |
| BA                | 4.21               | 0.010      | 0.65  |            |       |            |       | 0.011  | 0.75  |
| 2-chlorophenol    | 8.48               | 0.032      | 0.58  |            |       |            |       |        |       |
| phenylurea        | 13.82              | 0.27       | 0.75  | 0.0085     | 0.98  |            |       |        |       |
| $\beta$ -carotene |                    | 3.8        | 0.98  | 3.7        | 0.98  | 4.4        | 0.97  |        |       |
| 1,4-benzoquinone  |                    | 0.42       | 0.99  | 0.065      | 0.99  | 0.017      | 0.95  |        |       |
| ethyl alcohol     | 16.00              |            |       |            |       |            |       |        |       |
| isopropyl alcohol | 16.50              |            |       |            |       |            |       |        |       |
| mannitol          | 12.59 <sup>c</sup> |            |       |            |       |            |       |        |       |

\*the  $pK_a$  of scavengers were cited from Evans  $pK_a$  table.

<sup>c</sup> the  $pK_a$  of scavengers were calculated by ChemAxon.

**Table S4** Recovery of MeHg in different concentrations of 1, 4-benzoquinone solutions.

MeHg was added to 0.01 and 0.1 mmol L<sup>-1</sup> of 1, 4-benzoquinone solution (prepared in DI water) to form a final concentration of 1 ng L<sup>-1</sup>. MeHg in the solution was then determined using the aqueous ethylation derivatization-purge and trap-GC/CVAFS method without distillation.

| Concentration (mmol L <sup>-1</sup> ) | Recovery of MeHg (%) |
|---------------------------------------|----------------------|
| 0.1                                   | 7.7 ±1.0             |
| 0.01                                  | 85.0 ±9.3            |

**Table S5** Recovery of MeHg in the presence of 1 mmol L<sup>-1</sup>  $\beta$ -carotene after being incubated under sunlight or in the dark for 0-3 days.

A certain amount of  $\beta$ -carotene was added to 100 mL phosphate solutions (10 mmol L<sup>-1</sup>) in a quartz bottle to form a final concentration of 1 mmol L<sup>-1</sup>. The bottles were incubated under sunlight or in the dark for 0-3 days. MeHg was added to the  $\beta$ -carotene solutions after incubating for 0, 1, 3 days to form a final concentration of 1 ng L<sup>-1</sup> and equilibrated for 30 min. Then MeHg in the solution was measured by using distillation-aqueous ethylation derivatization-purge and trap-GC/CVAFS method. A good recovery of MeHg was observed in freshly prepared  $\beta$ -carotene solution. However,  $\beta$ -carotene was found to significantly affect the analysis of MeHg after incubating for >1 days and the effect became more pronounced with increasing incubation time.

| Incubation time | Recovery of MeHg (%) |                |
|-----------------|----------------------|----------------|
|                 | light                | dark           |
| 0 day           | 92.3 $\pm$ 3.6       | 92.3 $\pm$ 3.6 |
| 1 day           | 62.7 $\pm$ 4.2       | 70.7 $\pm$ 5.2 |
| 3 day           | 49.9 $\pm$ 4.7       | 58.1 $\pm$ 3.7 |

**Table S6** The influence of scavengers on water chemical characteristics in nature waters. LR, Laoshan Reservoir; IR, Ink River; SOB, Stone Old Beach. BA, benzoic acid; DABCO, 1, 4-diazobicyclo (2, 2, 2) octane; DMSO, dimethylsulphoxide; THF, tetrahydrofuran; SOD, superoxide dismutase.

| Scavengers                                  | pH   |      | Irradiance transmittance |        |        |         |        |        |         | Percentage of MeHg complexed with DOM (%) |          |          | Analysis of MeHg (recovery, %) |           |           |
|---------------------------------------------|------|------|--------------------------|--------|--------|---------|--------|--------|---------|-------------------------------------------|----------|----------|--------------------------------|-----------|-----------|
|                                             | LR   | IR   | SOB                      | UVB-LR | UVB-IR | UVB-SOB | UVA-LR | UVA-IR | UVA-SOB | LR                                        | IR       | SOB      | LR                             | IR        | SOB       |
| control                                     | 8.21 | 8.11 | 7.90                     | 100.0  | 100.0  | 100.0   | 100.0  | 100.0  | 100.0   | 89.5±1.2                                  | 84.6±1.9 | 80.1±2.4 | 100.0                          | 100.0     | 100.0     |
| BA (1mmol L <sup>-1</sup> )                 | 6.71 | 6.62 | 6.93                     | 98.0   | 98.2   | 97.2    | 100.6  | 98.5   | 100.4   | /                                         | /        | /        | 94.3±5.3                       | 90.2±3.8  | 92.5±4.6  |
| BA (10 mmol L <sup>-1</sup> )               | 3.63 | 3.42 | 3.94                     | 69.9   | 75.9   | 69.4    | 100.6  | 105.0  | 100.5   | /                                         | /        | /        | 94.3±4.9                       | 80.3±4.3  | 73.7±3.2  |
| NaN <sub>3</sub> (1 mmol L <sup>-1</sup> )  | 8.24 | 8.13 | 7.95                     | 100.4  | 101.4  | 100     | 100.3  | 100.5  | 100.0   | 56.9±1.8                                  | 61.4±2.8 | 55.1±2.2 | 89.3±4.6                       | 93.6±6.8  | 92.8±5.1  |
| NaN <sub>3</sub> (10 mmol L <sup>-1</sup> ) | 8.35 | 8.27 | 7.99                     | 100.6  | 104.5  | 98.9    | 100.5  | 99.6   | 99.0    | 19.7±1.3                                  | 40.7±1.9 | 37.8±3.2 | 85.6±5.7                       | 92.1±5.4  | 80.9±4.1  |
| β-carotene (0.1 mmol L <sup>-1</sup> )      | 7.88 | 7.83 | 7.72                     | 39.2   | 62.1   | 71.3    | 44.00  | 73.6   | 77.2    | /                                         | /        | /        | 83.5±5.4                       | 85.2±3.5  | 80.3±4.3  |
| β-carotene (1 mmol L <sup>-1</sup> )        | 8.05 | 8.12 | 7.85                     | 6.2    | 5.7    | 57.1    | 5.8    | 4.8    | 58.7    | /                                         | /        | /        | 76.9±4.6                       | 84.7±4.5  | 75.8±3.4  |
| DABCO                                       | 9.52 | 9.43 | 9.37                     | 100.9  | 103.4  | 100.8   | 100.6  | 105.6  | 100.6   | /                                         | /        | /        | 91.6±6.6                       | 92.1±4.9  | 91.7±5.6  |
| SOD(10 mg L <sup>-1</sup> )                 | 8.16 | 8.10 | 7.96                     | 102.5  | 92.3   | 98.7    | 101.7  | 96.6   | 99.3    | 58.8±3.1                                  | 21.7±1.8 | 14.8±0.7 | 90.4±5.4                       | 93.5±5.7  | 95.4±3.2  |
| SOD(0.1 mg L <sup>-1</sup> )                | 8.18 | 8.17 | 7.93                     | 101.5  | 100.5  | 100.7   | 100.3  | 101.6  | 100.9   | 96.0±0.5                                  | 88.2±3.3 | 79.0±0.7 | 93.4±0.5                       | 99.6±9.4  | 92.5±1.5  |
| DMSO                                        | 8.12 | 8.06 | 7.94                     | 100.6  | 100.5  | 99.8    | 100.4  | 100.8  | 99.8    | 37.4±2.0                                  | 44.4±3.0 | 66.1±3.2 | 96.0±3.5                       | 90.5±5.2  | 100.2±3.9 |
| isopropyl alcohol                           | 8.22 | 7.91 | 7.93                     | 101.0  | 101.6  | 100.1   | 100.7  | 98.7   | 100.0   | 89.3±4.5                                  | 83.1±0.5 | 80.5±2.6 | 91.0±4.6                       | 94.3±5.9  | 94.1±3.6  |
| THF                                         | 8.24 | 8.05 | 7.94                     | 101.2  | 100.6  | 100.3   | 100.5  | 99.2   | 100.2   | 90.4±2.1                                  | 82.4±3.3 | 81.7±2.3 | 90.3±5.3                       | 92.5±4.0  | 100.5±5.7 |
| isoprene                                    | 8.27 | 8.07 | 7.81                     | 100.9  | 100.8  | 100.6   | 100.9  | 102.1  | 100.6   | 89.0±3.0                                  | 82.6±2.1 | 81.2±2.3 | 88.3±4.1                       | 105±4.3   | 91.2±8.4  |
| N <sub>2</sub> O/isopropyl alcohol          | 8.41 | 8.52 | 8.05                     | 101.2  | 101.3  | 101.1   | 100.8  | 104.4  | 100.9   | 89.3±4.5                                  | 83.1±0.5 | 80.5±2.6 | 105.2±2.5                      | 100.5±4.2 | 90.3±4.3  |

## References:

- (1) Su, H.; Yang, R. J.; Zhang, A. B.; Li, Y., Dissolved iron distribution and organic complexation in the coastal waters of the East China Sea. *Mar. Chem.* **2015**, *173*, 208-221.
- (2) Coelho, C.; Guyot, G.; ter Halle, A.; Cavani, L.; Ciavatta, C.; Richard, C., Photoreactivity of humic substances: relationship between fluorescence and singlet oxygen production. *Environ.l Chem. Let.* **2010**, *9*, 447-451.
- (3) Zhou, Q. Q.; Su, R. G.; Bai, Y.; Zhang, C. S.; Shi, X. Y., Characterization of Chromophoric Dissolved Organic Matter ( CDOM ) in Zhoushan Fishery Using Excitation- Emission Matrix Spectroscopy(EEMs) and Parallel Factor Analysis(PARAFAC). *Environ. Sci.* **2015**, *1*, 163-170.
- (4) Wang, Z.; Cao, J.; Meng, F., Interactions between protein-like and humic-like components in dissolved organic matter revealed by fluorescence quenching. *Water Res.* **2015**, *68*, 404-413.
- (5) Batista, A. P.; Teixeira, A. C.; Cooper, W. J.; Cottrell, B. A., Correlating the chemical and spectroscopic characteristics of natural organic matter with the photodegradation of sulfamerazine. *Water Res.* **2016**, *93*, 20-29.
- (6) De Laurentiis, E.; Buoso, S.; Maurino, V.; Minero, C.; Vione, D., Optical and photochemical characterization of chromophoric dissolved organic matter from lakes in Terra Nova Bay, Antarctica. Evidence of considerable photoreactivity in an extreme environment. *Environ. Sci. Technol.* **2013**, *47*, 14089-14098.
- (7) Su, R. G.; Bai, Y.; Zhang, C. S.; Shi, X. Y., The assessment of the spatial and seasonal variability of chromophoric dissolved organic matter in the Southern Yellow Sea and the East China Sea. *Mar. Pollut. Bull.* **2015**, *100*, 523-33.
- (8) Fernandez-Gomez, C.; Drott, A.; Bjorn, E.; Diez, S.; Bayona, J. M.; Tesfalidet, S.; Lindfors, A.; Skjellberg, U., Towards universal wavelength-specific photodegradation rate constants for methyl mercury in humic waters, exemplified by a Boreal lake-wetland gradient. *Environ. Sci. Technol.* **2013**, *47*, 6279-6287.
- (9) Pan, Z. T., Acid-base titrimetry. In *Analytical Chemistry*; 5th ed. Higher Education Press: Beijing, China, 2005; pp 116-120.
- (10) Daniel, C. H.. *Quantitative Chemical Analysis*, 6th ed.; W.H.Freeman and Company: New York, NY, 2003; pp 205-232.
- (11) Hintelmann, H.; Welbourn, P. M.; Evans, R.D., Binding of Methylmercury Compounds by Humic and Fulvic Acids. *Environ. Sci. Technol.* **2011**, *45*, 7693-7700.
- (12) Amirbahman, A.; Reid, A. L.; Haines, T. A.; Kahl, J. S.; Arnold, C., Association of methylmercury with dissolved humic acids. *Water, Air, and Soil Pollut.* **1995**, *80*, 1031-1034.
- (13) Karlsson, T.; Skjellberg, U., Bonding of ppb levels of methyl mercury to reduced sulfur groups in soil organic matter. *Environ. Sci. Technol.* **2003**, *37*, 4912-4918.
- (14) Mason, R. P., *Trace Metals in Aquatic Systems*. John Wiley and Sons, Groton, CT, 2013; pp 116-118.
- (15) Salve, P. R.; Lohkare, H.; Gobre, T.; Bodhe, G.; Krupadam, R. J.; Ramteke, D. S.; Wate, S. R., Characterization of chromophoric dissolved organic matter (CDOM) in rainwater using fluorescence spectrophotometry. *Bull. Environ. Cont. Toxicol.* **2012**, *88*, 215-218.
- (16) Bai, Y.; Su, R.; Shi, X., Assessing the dynamics of chromophoric dissolved organic matter in the southern Yellow Sea by excitation–emission matrix fluorescence and parallel factor analysis (EEM-PARAFAC). *Continental Shelf Res.* **2014**, *88*, 103-116.
